# Supplementary material for: Respiratory Syncytial Virus Infections Enhance Cigarette Smoke Induced COPD in Mice
Source: PubMed Central journal article supplement (PMC3938768; doi:10.1371/journal.pone.0090567), 2014-02-28
Supplement: pone.0090567.s003.pdf [file pone.0090567.s003.pdf]

**Table S1. Protease gene responses in airways to RSV infections and cigarette smoke exposure.**

| Target      | Stimuli       |            |              |           |
|-------------|---------------|------------|--------------|-----------|
|             | Mock/Room air | Mock/Smoke | RSV/Room air | RSV/Smoke |
| MMP-3       | 1.00±0.34     | 1.23±0.14  | 0.79±0.23    | 0.79±0.10 |
| MMP-7       | 1.00±0.51     | 1.72±0.59  | 3.28±1.18    | 2.55±0.56 |
| MMP-10      | 1.00±0.20     | 0.61±0.17  | 1.24±0.37    | 0.84±0.15 |
| MMP-11      | 1.00±0.18     | 0.92±0.11  | 1.18±0.21    | 1.21±0.34 |
| MMP-15      | 1.00±0.29     | 0.75±0.06  | 0.53±0.04    | 0.60±0.13 |
| MMP-17      | 1.00±0.18     | 1.26±0.24  | 0.76±0.10    | 0.88±0.15 |
| MMP-21      | 1.00±0.17     | 0.78±0.14  | 0.59±0.20    | 1.24±0.41 |
| MMP-24      | 1.00±0.24     | 0.62±0.20  | 0.62±0.12    | 0.76±0.25 |
| MMP-25      | 1.00±0.12     | 1.09±0.41  | 1.24±0.20    | 1.45±0.12 |
| MMP-27      | 1.00±0.23     | 0.87±0.24  | 0.81±0.21    | 1.24±0.23 |
| Cathepsin B | 1.00±0.11     | 1.14±0.11  | 0.81±0.05    | 0.84±0.16 |
| Cathepsin C | 1.00±0.07     | 1.13±0.08  | 1.16±0.12    | 1.43±0.18 |
| Cathepsin D | 1.00±0.13     | 1.30±0.15  | 1.32±0.13    | 1.67±0.30 |
| Cathepsin H | 1.00±0.18     | 1.12±0.24  | 0.99±0.08    | 1.18±0.25 |
| Cathepsin O | 1.00±0.07     | 1.17±0.11  | 1.06±0.11    | 1.25±0.06 |

Values are represented as mean ± S.E.M., where each measurement was performed 3 times on 12 animals/group.
