# Supplementary material for: Respiratory Syncytial Virus Infections Enhance Cigarette Smoke Induced COPD in Mice
Source: PubMed Central journal article supplement (PMC3938768; doi:10.1371/journal.pone.0090567), 2014-02-28
Supplement: pone.0090567.s004.pdf [file pone.0090567.s004.pdf]

**Table S2. Cytokine release in airways to RSV infections and cigarette smoke exposure.**

| Cytokine (pg/ml) | Mock/Room air | RSV/Room air | Mock/Smoke  | RSV/Smoke   |
|------------------|---------------|--------------|-------------|-------------|
| IL-2             | 7.54±1.52     | 6.10±0.46    | 6.40±0.53   | 5.12±0.41   |
| IL-4             | 0.14±0.01     | 0.15±0.01    | 0.14±0.02   | 0.14±0.02   |
| IL-7             | 0.43±0.09     | 0.36±0.12    | 0.30±0.10   | 0.30±0.15   |
| IL-9             | 243.10±33.95  | 213.30±9.07  | 203.80±6.19 | 192.70±5.65 |
| IL-12p40         | 8.47±0.57     | 7.93±0.33    | 7.91±0.34   | 8.29±0.52   |
| IL-12p70         | 12.15±2.41    | 8.17±1.24    | 9.92±1.80   | 8.78±1.45   |
| IL-15            | 8.44±2.31     | 6.55±1.78    | 4.10±1.14   | 3.38±0.77   |
| MCP-1            | 64.57±2.12    | 75.14±8.23   | 71.77±3.60  | 86.99±16.70 |
| VEGF             | 2.02±0.33     | 1.75±0.41    | 1.22±0.24   | 1.69±0.25   |
| MIP-1 $\alpha$   | 104.10±3.12   | 98.13±1.20   | 98.99±1.11  | 96.19±1.23  |
| MIP-1 $\beta$    | 67.25±2.73    | 60.74±3.39   | 61.95±1.80  | 60.71±2.31  |
| Eotaxin          | 5.63±0.41     | 5.50±0.17    | 5.72±0.17   | 5.89±0.32   |
| M-CSF            | 20.76±0.55    | 21.74±1.4    | 20.24±1.00  | 19.52±0.80  |

Values are represented as mean  $\pm$  S.E.M., where each measurement was performed 3 times on 12 animals/group.
