# Supplementary material for: Respiratory Syncytial Virus Infections Enhance Cigarette Smoke Induced COPD in Mice
Source: PubMed Central journal article supplement (PMC3938768; doi:10.1371/journal.pone.0090567), 2014-02-28
Supplement: pone.0090567.s005.pdf [file pone.0090567.s005.pdf]

**Table S3. Cytokine gene responses in airways to RSV infections and cigarette smoke exposure.**

| Target       | Stimuli       |              |            |           |
|--------------|---------------|--------------|------------|-----------|
|              | Mock/Room air | RSV/Room air | Mock/Smoke | RSV/Smoke |
| IL-4         | 1.00±0.13     | 2.37±0.98    | 2.10±0.89  | 2.95±1.27 |
| IL-12        | 1.00±0.15     | 1.64±0.11    | 1.15±0.20  | 1.97±0.32 |
| IL-18        | 1.00±0.18     | 1.32±0.16    | 1.47±0.20  | 0.97±0.12 |
| IL-22        | 1.00±0.24     | 1.03±0.49    | 1.14±0.38  | 0.81±0.37 |
| IL-23        | 1.00±0.30     | 0.94±0.24    | 1.66±0.19  | 1.84±0.19 |
| TGF- $\beta$ | 1.00±0.21     | 1.47±0.22    | 1.06±0.19  | 1.46±0.30 |
| VEGF         | 1.00±0.35     | 1.27±0.19    | 0.97±0.21  | 1.53±0.51 |

Values are represented as mean  $\pm$  S.E.M., where each measurement was performed 3 times on 12 animals/group.
