# Supplementary material for: Respiratory Syncytial Virus Infections Enhance Cigarette Smoke Induced COPD in Mice
Source: PubMed Central journal article supplement (PMC3938768; doi:10.1371/journal.pone.0090567), 2014-02-28
Supplement: pone.0090567.s006.pdf [file pone.0090567.s006.pdf]

## **SUPPLEMENTAL METHODS**

### **NFB and AP1 activation**

NF- $\kappa$ B and AP-1 activation were measured on the nuclear protein extracts using specific activation assays from Active Motif (46096 and 40096; Active Motif, Carlsbad, CA, USA). Results of transcription factors activity are represented as relative activity as a percentage compared to the vehicle treated group.
